# Supplementary material for: High-performance flexible and integratable MEG devices from sulfonated carbon solid acids containing strong Brønsted acid sites
Source: Royal Society of Chemistry journal article supplement (doi:10.1039/d1ta06757e), 2021-01-01
Supplement: d1ta06757e1.pdf [file d1ta06757e1.pdf]

## Supporting Information

# High performance flexible and integratable MEG device from sulfonated carbon solid acids containing strong Brønsted acid sites

Kun Gao,<sup>a</sup> Jianhan Sun,<sup>a</sup> Xiangyun Lin,<sup>a</sup> Yuanyuan Li,<sup>a</sup> Xiaotong Sun,<sup>a</sup>  
Nan Chen<sup>\*.a</sup> and Liangti Qu<sup>\*.b</sup>

<sup>a</sup> Key Laboratory of Photoelectronic/Electrophotonic Conversion Materials, Key Laboratory of Cluster Science, Ministry of Education of China, School of Chemistry and Chemical Engineering, Beijing Institute of Technology, Beijing 100081, P. R. China. E-mail: gabechain@bit.edu.cn

<sup>b</sup> Key Laboratory of Organic Optoelectronics & Molecular Engineering, Ministry of Education, Department of Chemistry, Tsinghua University, Beijing 100084, China. E-mail: lqu@mail.tsinghua.edu.cn.

## 1. Preparation of SAC.

Mix 5g activated carbon with 30mL  $\text{H}_2\text{SO}_4$  (98wt%) and heat to  $180^\circ\text{C}$  for 24h. After cooling to room temperature, the solution was filtered, and the solid was washed with deionized water until the filtrate was detected without sulfate by  $\text{BaCl}_2$ . The obtained SAC was dried at  $70^\circ\text{C}$ .

## 2. Preparation of CSC.

20 g of cellulose powder is slowly added to 60 mL of concentrated  $\text{H}_2\text{SO}_4$  (98 wt%). The mixture was stirred vigorously and heated to  $250^\circ\text{C}$  for 2h. After cooling to room temperature, the solution was filtered, and the solid was washed with deionized water until the filtrate was detected without sulfate by  $\text{BaCl}_2$ . The obtained CSC was dried at  $70^\circ\text{C}$ .

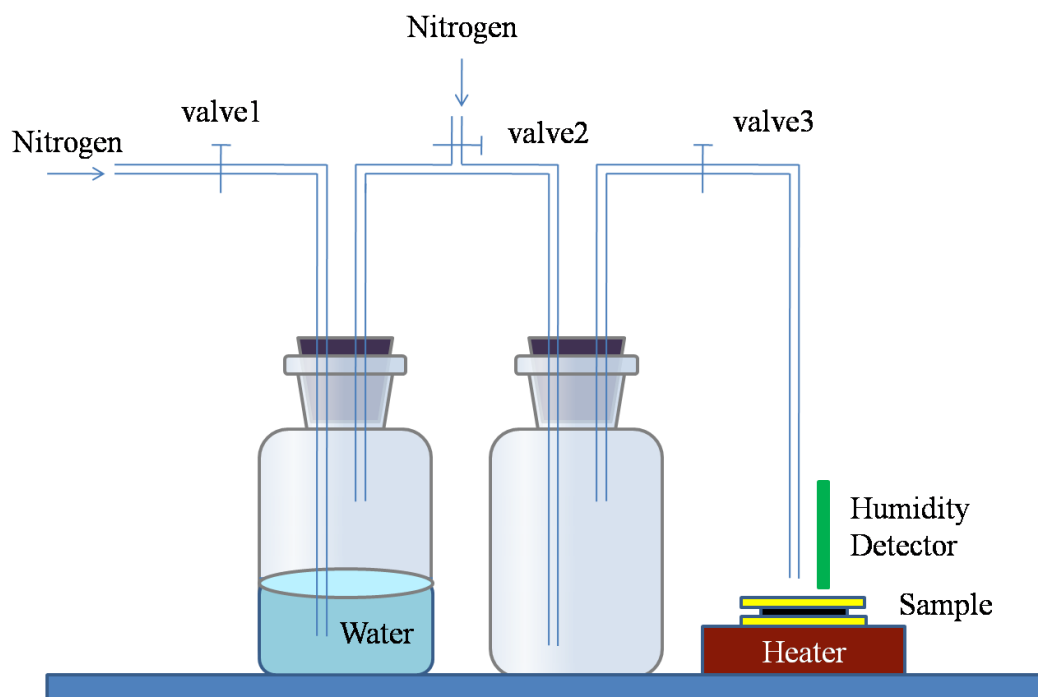

Fig. S1. The schematic diagram of moisture circulating system.

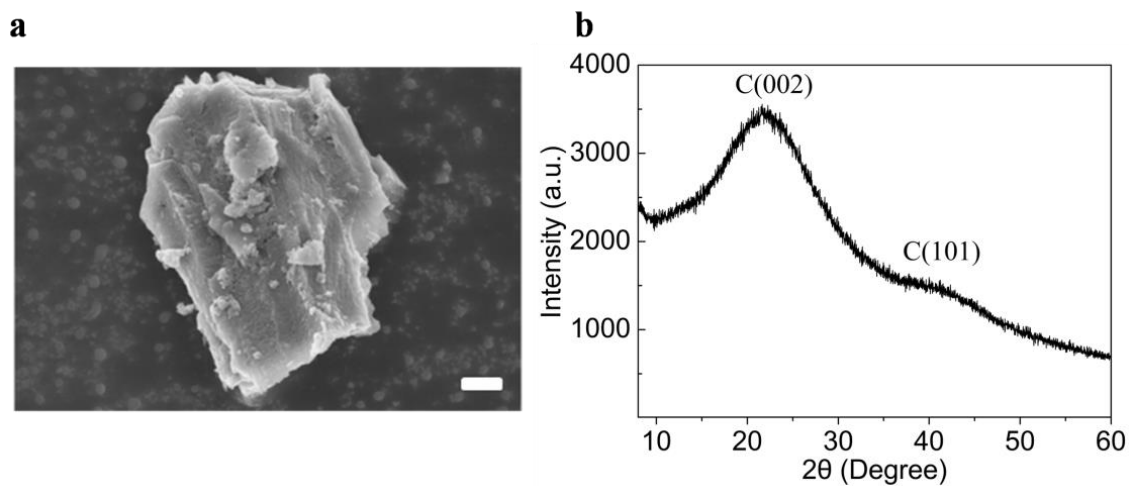

Fig. S2. (a) SEM images of SC; (b) XRD pattern of SC. Scale bars: (a) 2 $\mu$ m.

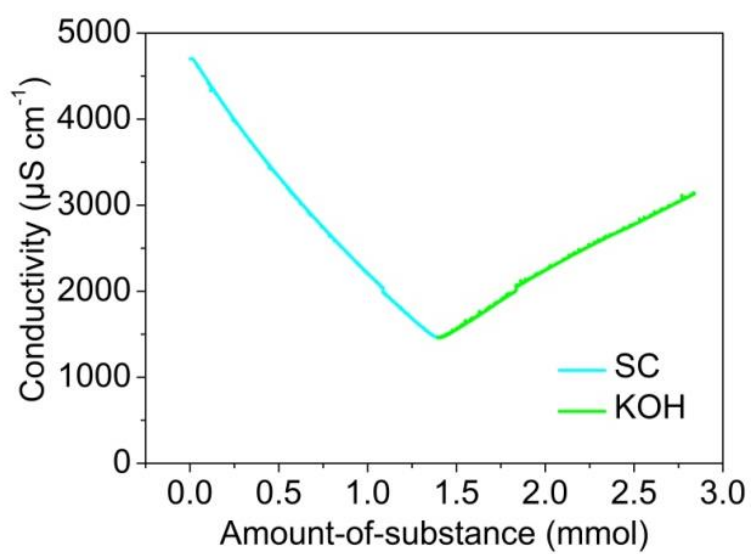

Fig. S3. Conductivity titration of SC.

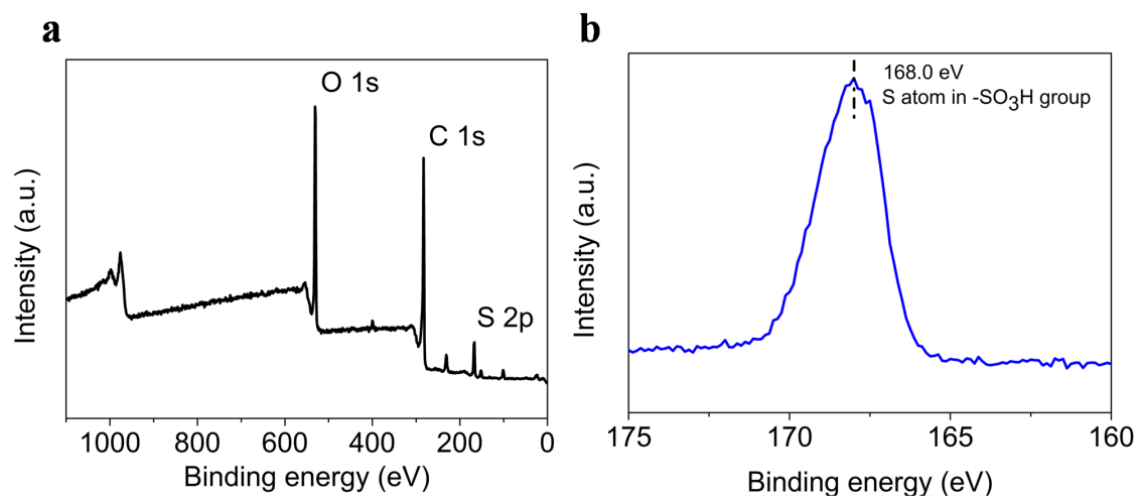

Fig. S4. (a) XPS survey spectrum of the SC; (b) High-resolution S 2p spectra of SC.

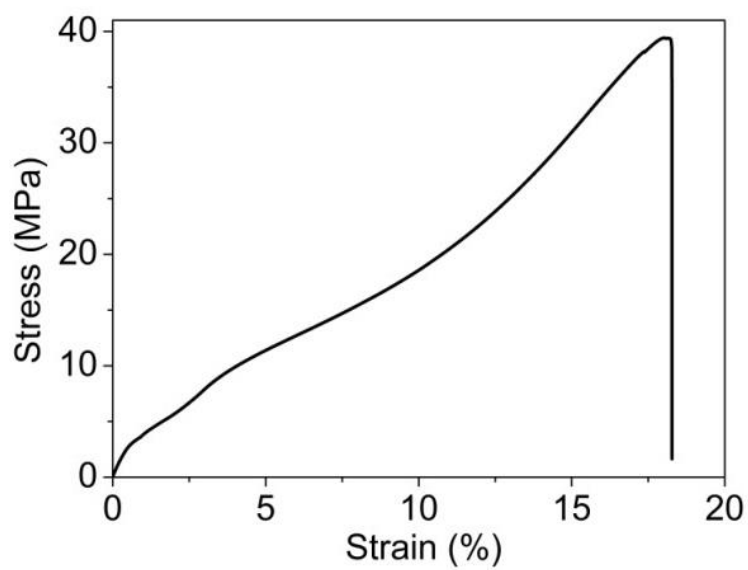

Fig. S5. Stress-strain curves of the PSM.

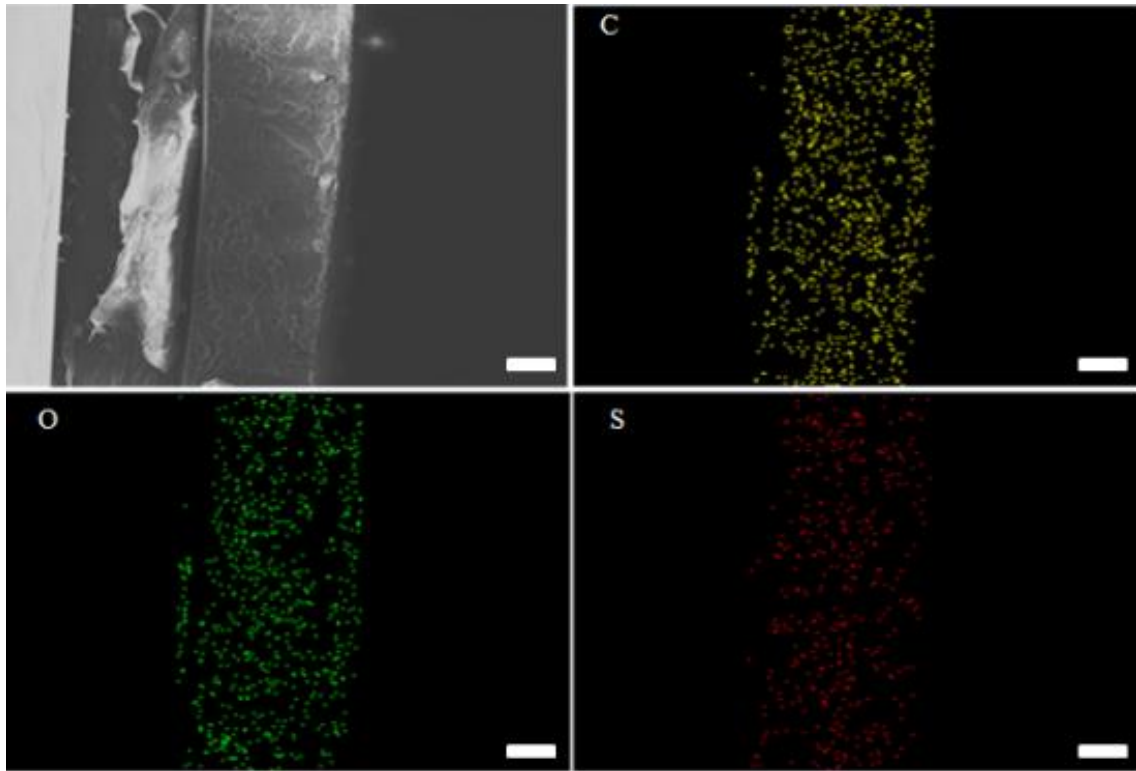

Fig. S6. Side Surface SEM images of PSM and element distribution of C, O, and S in PSM. Scale bars: (a) 50 $\mu\text{m}$ ; (b) 50 $\mu\text{m}$ ; (c) 50 $\mu\text{m}$ ; (d) 50 $\mu\text{m}$ .

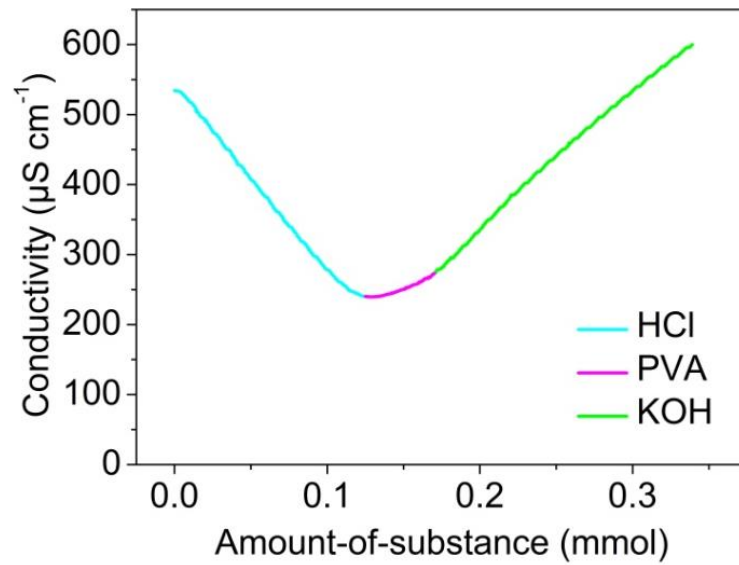

Fig. S7. Conductivity titration curve of PVA acidified with HCl.

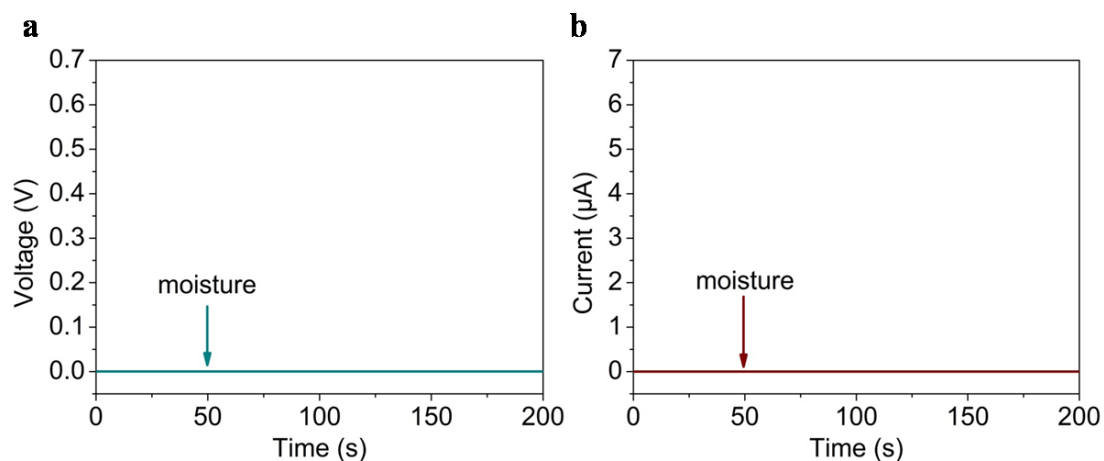

Fig. S8. (a) Voltage and (b) current output of MEG using Au@quartz when PSM is removed (electrode-air-electrode). Sample area:  $1.2 \text{ cm}^2$ , at  $25 \text{ }^\circ\text{C}$  with  $70\% \Delta\text{RH}$ .

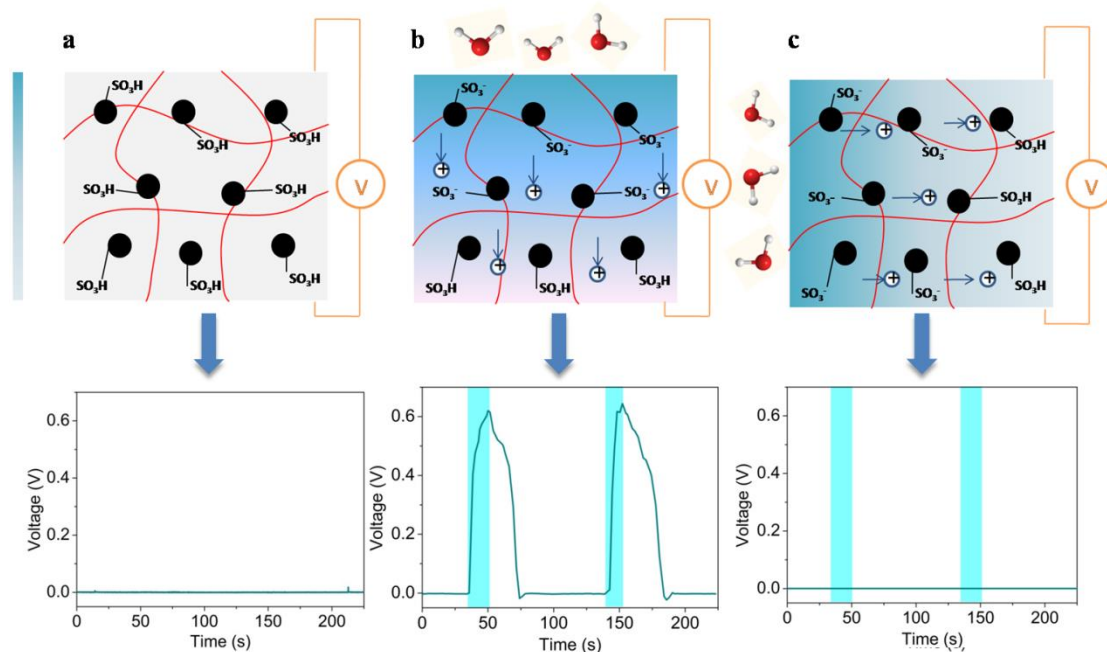

Fig. S9. The induced voltage of rSC-MEG under different humidity conditions ((a) no humidity; (b) positive humidity; (c) lateral humidity) the induced voltage of rSC-MEG.

Under different wetting conditions, ion movement and voltage output in PSM-1. Blue corresponds to wetting; white corresponds to dry and the degree of wetting increases as the blue becomes darker. (a) When the PSM-1 is dry, the  $H^+$  in the PSM-1 do not move, and the SC-MEG has no voltage output. (b) Moisture is blown from the top electrode to the bottom electrode, and  $H^+$  migrate to the bottom electrode. A difference in ion concentration is formed between the two electrodes of SC-MEG, and there is a voltage output. (c) Moisture is blown toward the SC-MEG from the side, and  $H^+$  migrate along the wetting direction of the PSM-1. There is no ion concentration difference between the two electrodes of the SC-MEG, and there is no voltage output. Sample area:  $1.2 \text{ cm}^2$ , at  $25 \text{ }^\circ\text{C}$  with  $70\% \Delta\text{RH}$ .

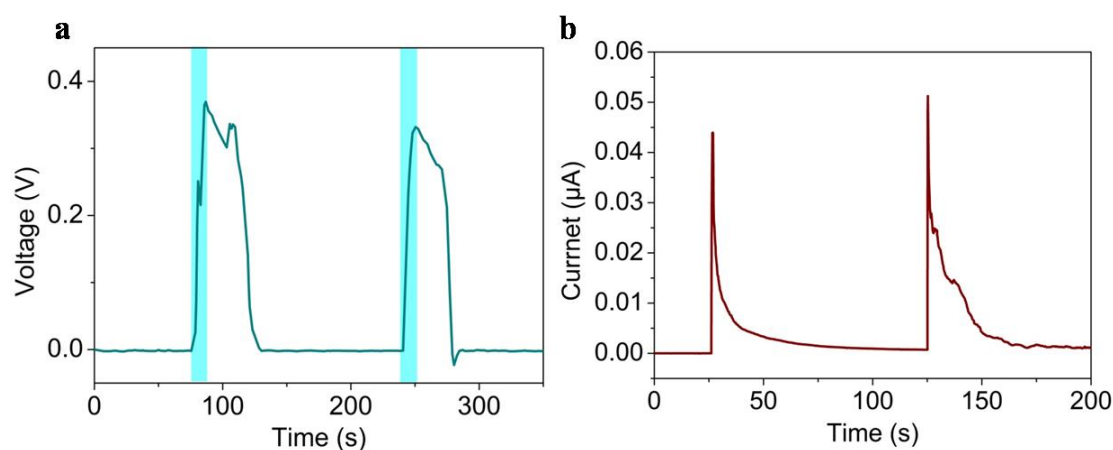

Fig. S10. (a) Voltage and (b) current output of SAC-MEG. Sample area:  $1.2 \text{ cm}^2$ , at  $25 \text{ }^\circ\text{C}$  with  $70\% \Delta\text{RH}$ .

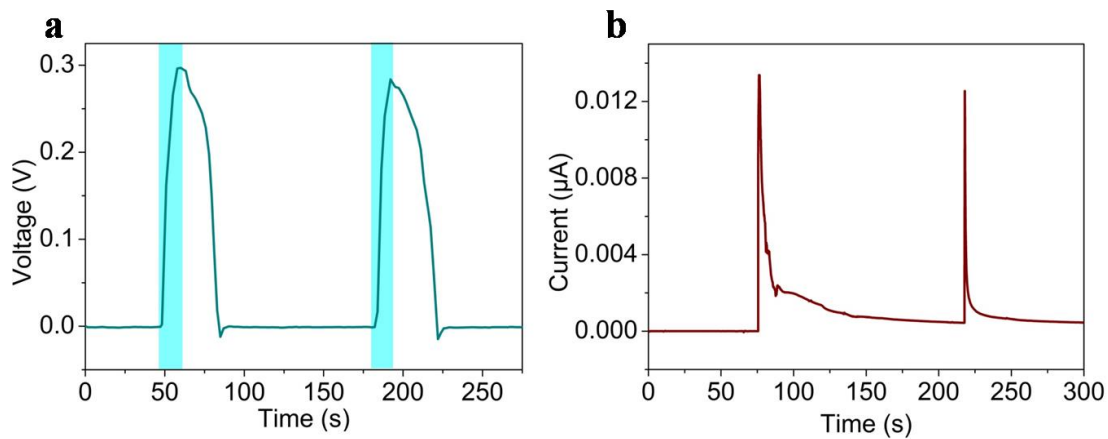

Fig. S11. (a) Voltage and (b) current of MEG using PVA.

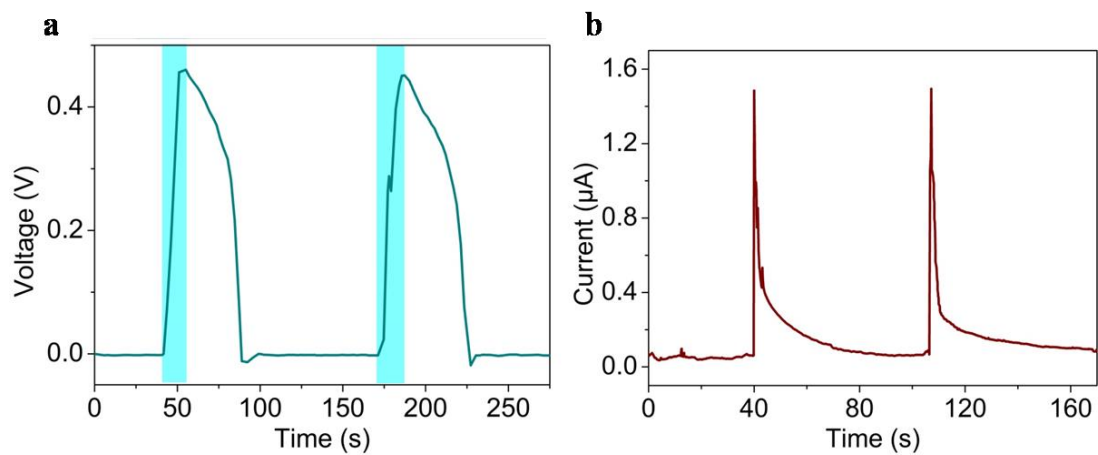

Fig. S12. (a) Voltage and (b) current output of CSC-MEG. Sample area: 1.2 cm<sup>2</sup>, at 25 °C with 70% ΔRH.



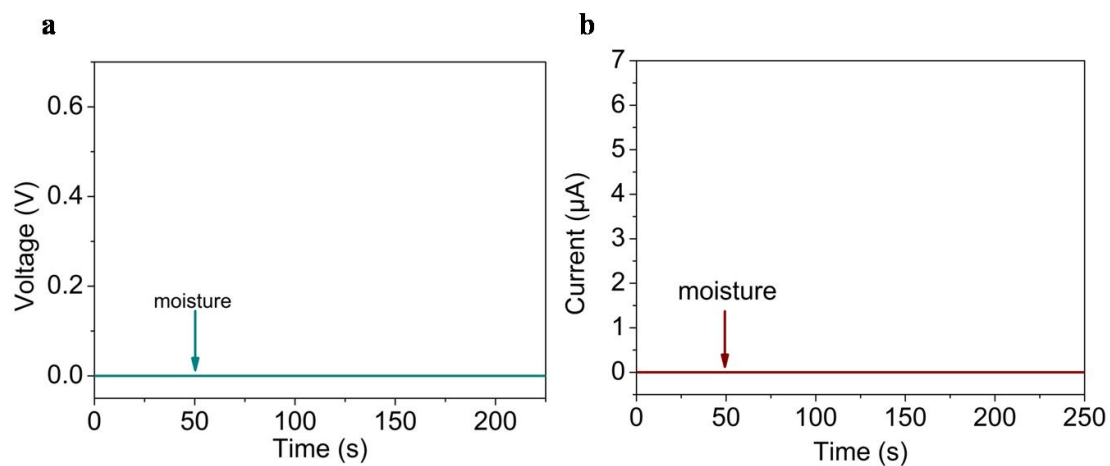

Fig. S13. (a) Voltage and (b) current output of MEG using Ag@PET when PSM is removed (electrode-air-electrode). Sample area: 1.2 cm<sup>2</sup>, at 25 °C with 70% ΔRH.

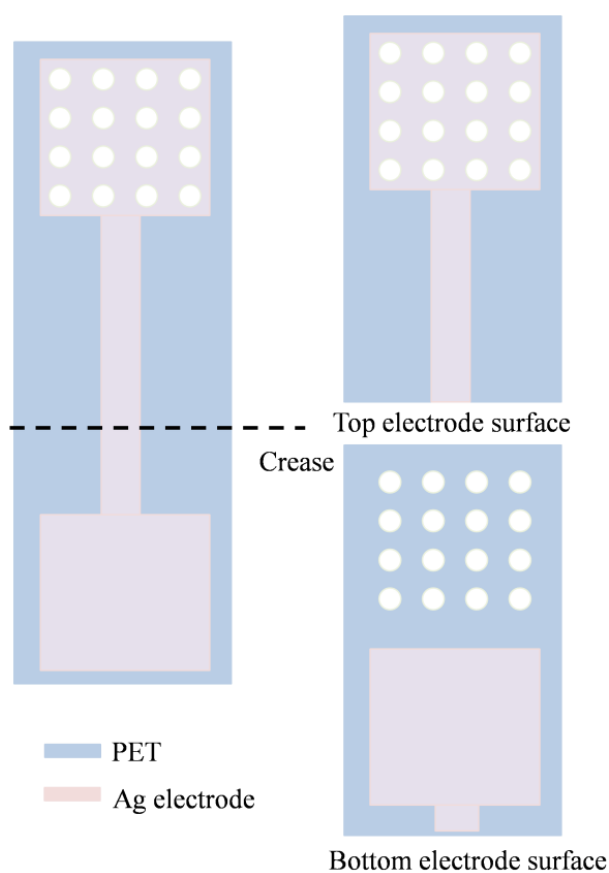

Fig. S14. Schematic diagram of CIPS electrodes.

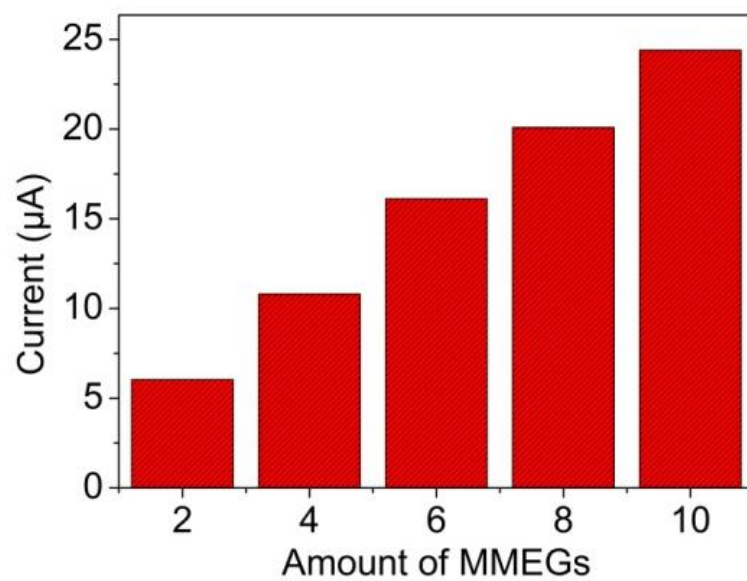

Fig. S15. Parallel current curve of the SC-MEGs. Sample area: 1.2 cm<sup>2</sup>, at 25 °C with 70% ΔRH.
